# Supplementary material
Source: publisher figshare collection journal article supplement (https://acs.figshare.com/ndownloader/files/5336308)
Supplement: Supplementary file 1 [file 5336308]

  
data_060620d 
  
_audit_creation_method            SHELXL-97 
_chemical_name_systematic 
; 
 ? 
; 
_chemical_name_common             ? 
_chemical_melting_point           ? 
_chemical_formula_moiety          ? 
_chemical_formula_sum 
 'C19 H13 Cl3 Fe4 O14 S4' 
_chemical_formula_weight          923.28 
  
loop_ 
 _atom_type_symbol 
 _atom_type_description 
 _atom_type_scat_dispersion_real 
 _atom_type_scat_dispersion_imag 
 _atom_type_scat_source 
 'C'  'C'   0.0033   0.0016 
 'International Tables Vol C Tables 4.2.6.8 and 6.1.1.4' 
 'H'  'H'   0.0000   0.0000 
 'International Tables Vol C Tables 4.2.6.8 and 6.1.1.4' 
 'O'  'O'   0.0106   0.0060 
 'International Tables Vol C Tables 4.2.6.8 and 6.1.1.4' 
 'Cl'  'Cl'   0.1484   0.1585 
 'International Tables Vol C Tables 4.2.6.8 and 6.1.1.4' 
 'S'  'S'   0.1246   0.1234 
 'International Tables Vol C Tables 4.2.6.8 and 6.1.1.4' 
 'Fe'  'Fe'   0.3463   0.8444 
 'International Tables Vol C Tables 4.2.6.8 and 6.1.1.4' 
  
_symmetry_cell_setting            Monoclinic 
_symmetry_space_group_name_H-M    P2(1)/n 
  
loop_ 
 _symmetry_equiv_pos_as_xyz 
 'x, y, z' 
 '-x+1/2, y+1/2, -z+1/2' 
 '-x, -y, -z' 
 'x-1/2, -y-1/2, z-1/2' 
  
_cell_length_a                    15.122(4) 
_cell_length_b                    6.9241(18) 
_cell_length_c                    32.378(9) 
_cell_angle_alpha                 90.00 
_cell_angle_beta                  99.132(5) 
_cell_angle_gamma                 90.00 
_cell_volume                      3347.2(15) 
_cell_formula_units_Z             4 
_cell_measurement_temperature     294(2) 
_cell_measurement_reflns_used     1681 
_cell_measurement_theta_min       2.52 
_cell_measurement_theta_max       18.75 
  
_exptl_crystal_description        ? 
_exptl_crystal_colour             ? 
_exptl_crystal_size_max           0.28 
_exptl_crystal_size_mid           0.18 
_exptl_crystal_size_min           0.12 
_exptl_crystal_density_meas       none 
_exptl_crystal_density_diffrn     1.832 
_exptl_crystal_density_method     'not measured' 
_exptl_crystal_F_000              1832 
_exptl_absorpt_coefficient_mu     2.247 
_exptl_absorpt_correction_type    MULTI-SCAN 
_exptl_absorpt_correction_T_min   0.548083 
_exptl_absorpt_correction_T_max   1.000000 
_exptl_absorpt_process_details    SADABS 
  
_exptl_special_details 
; 
 ? 
; 
  
_diffrn_ambient_temperature       294(2) 
_diffrn_radiation_wavelength      0.71073 
_diffrn_radiation_type            MoK\a 
_diffrn_radiation_source          'fine-focus sealed tube' 
_diffrn_radiation_monochromator   graphite 
_diffrn_measurement_device_type   'CCD area detector' 
_diffrn_measurement_method        'phi and omega scans' 
_diffrn_detector_area_resol_mean  ? 
_diffrn_standards_number          . 
_diffrn_standards_interval_count  . 
_diffrn_standards_interval_time   . 
_diffrn_standards_decay_%         . 
_diffrn_reflns_number             18218 
_diffrn_reflns_av_R_equivalents   0.1249 
_diffrn_reflns_av_sigmaI/netI     0.1823 
_diffrn_reflns_limit_h_min        -9 
_diffrn_reflns_limit_h_max        18 
_diffrn_reflns_limit_k_min        -8 
_diffrn_reflns_limit_k_max        8 
_diffrn_reflns_limit_l_min        -40 
_diffrn_reflns_limit_l_max        37 
_diffrn_reflns_theta_min          1.27 
_diffrn_reflns_theta_max          26.53 
_reflns_number_total              6892 
_reflns_number_gt                 2633 
_reflns_threshold_expression      >2sigma(I) 
  
_computing_data_collection        'Bruker SMART' 
_computing_cell_refinement        'Bruker SMART' 
_computing_data_reduction         'Bruker SAINT' 
_computing_structure_solution     'SHELXS-97 (Sheldrick, 1990)' 
_computing_structure_refinement   'SHELXL-97 (Sheldrick, 1997)' 
_computing_molecular_graphics     'Bruker SHELXTL' 
_computing_publication_material   'Bruker SHELXTL' 
  
_refine_special_details 
; 
 Refinement of F^2^ against ALL reflections.  The weighted R-factor wR and 
 goodness of fit S are based on F^2^, conventional R-factors R are based 
 on F, with F set to zero for negative F^2^. The threshold expression of 
 F^2^ > 2sigma(F^2^) is used only for calculating R-factors(gt) etc. and is 
 not relevant to the choice of reflections for refinement.  R-factors based 
 on F^2^ are statistically about twice as large as those based on F, and R- 
 factors based on ALL data will be even larger. 
; 
  
_refine_ls_structure_factor_coef  Fsqd 
_refine_ls_matrix_type            full 
_refine_ls_weighting_scheme       calc 
_refine_ls_weighting_details 
 'calc w=1/[\s^2^(Fo^2^)+(0.0100P)^2^+0.0000P] where P=(Fo^2^+2Fc^2^)/3' 
_atom_sites_solution_primary      direct 
_atom_sites_solution_secondary    difmap 
_atom_sites_solution_hydrogens    geom 
_refine_ls_hydrogen_treatment     CONSTR 
_refine_ls_extinction_method      none 
_refine_ls_extinction_coef        ? 
_refine_ls_number_reflns          6892 
_refine_ls_number_parameters      399 
_refine_ls_number_restraints      0 
_refine_ls_R_factor_all           0.1934 
_refine_ls_R_factor_gt            0.0556 
_refine_ls_wR_factor_ref          0.0903 
_refine_ls_wR_factor_gt           0.0679 
_refine_ls_goodness_of_fit_ref    0.981 
_refine_ls_restrained_S_all       0.981 
_refine_ls_shift/su_max           0.001 
_refine_ls_shift/su_mean          0.000 
  
loop_ 
 _atom_site_label 
 _atom_site_type_symbol 
 _atom_site_fract_x 
 _atom_site_fract_y 
 _atom_site_fract_z 
 _atom_site_U_iso_or_equiv 
 _atom_site_adp_type 
 _atom_site_occupancy 
 _atom_site_symmetry_multiplicity 
 _atom_site_calc_flag 
 _atom_site_refinement_flags 
 _atom_site_disorder_assembly 
 _atom_site_disorder_group 
Fe1 Fe 0.98486(6) 0.03302(14) 0.09705(3) 0.0452(3) Uani 1 1 d . . . 
Fe2 Fe 0.82198(6) 0.07685(12) 0.06734(3) 0.0412(3) Uani 1 1 d . . . 
Fe3 Fe 0.38060(6) 0.48075(14) 0.13652(3) 0.0517(3) Uani 1 1 d . . . 
Fe4 Fe 0.47488(6) 0.50208(13) 0.07932(3) 0.0450(3) Uani 1 1 d . . . 
S1 S 0.87890(12) -0.1938(2) 0.10028(5) 0.0417(5) Uani 1 1 d . . . 
S2 S 0.89178(12) 0.2337(2) 0.12482(6) 0.0503(5) Uani 1 1 d . . . 
S3 S 0.50735(12) 0.3088(2) 0.13578(6) 0.0509(5) Uani 1 1 d . . . 
S4 S 0.46511(12) 0.7401(2) 0.12566(6) 0.0482(5) Uani 1 1 d . . . 
O1 O 1.1166(4) -0.0867(8) 0.16809(18) 0.099(2) Uani 1 1 d . . . 
O2 O 1.0409(4) -0.1954(8) 0.02963(18) 0.0861(19) Uani 1 1 d . . . 
O3 O 1.0742(4) 0.3799(8) 0.0714(2) 0.105(2) Uani 1 1 d . . . 
O4 O 0.8036(4) -0.1329(7) -0.01200(16) 0.0775(18) Uani 1 1 d . . . 
O5 O 0.8293(3) 0.4386(7) 0.02133(16) 0.0761(17) Uani 1 1 d . . . 
O6 O 0.6316(3) 0.0554(8) 0.07529(17) 0.0812(19) Uani 1 1 d . . . 
O7 O 0.8027(4) -0.0871(7) 0.21463(13) 0.0734(16) Uani 1 1 d . . . 
H7 H 0.7687 -0.1800 0.2136 0.110 Uiso 1 1 calc R . . 
O8 O 0.3648(5) 0.4904(9) 0.2254(2) 0.115(2) Uani 1 1 d . . . 
O9 O 0.2775(4) 0.1273(8) 0.11359(18) 0.095(2) Uani 1 1 d . . . 
O10 O 0.2230(4) 0.7071(8) 0.1003(2) 0.124(3) Uani 1 1 d . . . 
O11 O 0.4262(4) 0.1569(8) 0.02750(18) 0.095(2) Uani 1 1 d . . . 
O12 O 0.3649(4) 0.7431(8) 0.01714(19) 0.103(2) Uani 1 1 d . . . 
O13 O 0.6552(4) 0.5788(8) 0.06002(18) 0.087(2) Uani 1 1 d . . . 
O14 O 0.6763(4) 0.6453(8) 0.21788(16) 0.0828(18) Uani 1 1 d . . . 
H14 H 0.6852 0.5680 0.2373 0.124 Uiso 1 1 calc R . . 
C1 C 1.0658(5) -0.0382(11) 0.1400(2) 0.060(2) Uani 1 1 d . . . 
C2 C 1.0208(5) -0.1054(11) 0.0564(3) 0.059(2) Uani 1 1 d . . . 
C3 C 1.0382(5) 0.2427(11) 0.0809(2) 0.063(2) Uani 1 1 d . . . 
C4 C 0.8112(4) -0.0530(10) 0.0198(2) 0.052(2) Uani 1 1 d . . . 
C5 C 0.8257(4) 0.2995(11) 0.0401(2) 0.049(2) Uani 1 1 d . . . 
C6 C 0.7061(5) 0.0697(10) 0.0725(2) 0.056(2) Uani 1 1 d . . . 
C7 C 0.8508(5) -0.2143(10) 0.1528(2) 0.055(2) Uani 1 1 d . . . 
H7A H 0.8049 -0.3128 0.1519 0.067 Uiso 1 1 calc R . . 
H7B H 0.9035 -0.2628 0.1708 0.067 Uiso 1 1 calc R . . 
C8 C 0.8193(6) -0.0426(11) 0.1735(2) 0.077(3) Uani 1 1 d . . . 
H8 H 0.7597 -0.0163 0.1576 0.093 Uiso 1 1 calc R . . 
C9 C 0.8661(5) 0.1372(10) 0.1729(2) 0.066(2) Uani 1 1 d . . . 
H9A H 0.9223 0.1240 0.1918 0.079 Uiso 1 1 calc R . . 
H9B H 0.8313 0.2340 0.1848 0.079 Uiso 1 1 calc R . . 
C10 C 0.3701(6) 0.4889(12) 0.1900(3) 0.083(3) Uani 1 1 d . . . 
C11 C 0.3193(5) 0.2641(11) 0.1232(2) 0.062(2) Uani 1 1 d . . . 
C12 C 0.2844(6) 0.6180(11) 0.1149(3) 0.076(3) Uani 1 1 d . . . 
C13 C 0.4456(5) 0.2903(11) 0.0480(2) 0.060(2) Uani 1 1 d . . . 
C14 C 0.4087(5) 0.6479(10) 0.0415(3) 0.061(2) Uani 1 1 d . . . 
C15 C 0.5840(5) 0.5488(11) 0.0665(2) 0.060(2) Uani 1 1 d . . . 
C16 C 0.6043(4) 0.4022(10) 0.1711(2) 0.060(2) Uani 1 1 d . . . 
H16A H 0.6201 0.3089 0.1934 0.071 Uiso 1 1 calc R . . 
H16B H 0.6542 0.4097 0.1558 0.071 Uiso 1 1 calc R . . 
C17 C 0.5942(5) 0.5970(11) 0.1909(2) 0.062(2) Uani 1 1 d . . . 
H17 H 0.5480 0.5831 0.2088 0.075 Uiso 1 1 calc R . . 
C18 C 0.5668(4) 0.7589(9) 0.1622(2) 0.061(2) Uani 1 1 d . . . 
H18A H 0.6150 0.7820 0.1463 0.073 Uiso 1 1 calc R . . 
H18B H 0.5622 0.8730 0.1791 0.073 Uiso 1 1 calc R . . 
C19 C 0.3878(5) 0.0422(12) 0.2627(2) 0.087(3) Uani 1 1 d . . . 
H19 H 0.3705 0.1727 0.2699 0.105 Uiso 1 1 calc R . . 
Cl1 Cl 0.49959(19) 0.0546(6) 0.25375(9) 0.1703(14) Uani 1 1 d . . . 
Cl2 Cl 0.31953(17) -0.0213(4) 0.21827(8) 0.1233(10) Uani 1 1 d . . . 
Cl3 Cl 0.3833(2) -0.0991(5) 0.30471(9) 0.1600(13) Uani 1 1 d . . . 
  
loop_ 
 _atom_site_aniso_label 
 _atom_site_aniso_U_11 
 _atom_site_aniso_U_22 
 _atom_site_aniso_U_33 
 _atom_site_aniso_U_23 
 _atom_site_aniso_U_13 
 _atom_site_aniso_U_12 
Fe1 0.0420(6) 0.0517(7) 0.0408(7) 0.0038(5) 0.0033(5) -0.0005(6) 
Fe2 0.0425(7) 0.0438(6) 0.0367(7) 0.0027(5) 0.0047(5) 0.0036(5) 
Fe3 0.0503(7) 0.0433(7) 0.0641(8) -0.0031(6) 0.0175(6) -0.0032(6) 
Fe4 0.0470(7) 0.0447(6) 0.0417(7) -0.0008(5) 0.0026(5) -0.0005(6) 
S1 0.0522(12) 0.0398(10) 0.0330(11) -0.0001(9) 0.0066(9) 0.0027(9) 
S2 0.0679(14) 0.0439(12) 0.0404(12) -0.0033(9) 0.0122(10) -0.0036(10) 
S3 0.0559(13) 0.0430(11) 0.0527(13) 0.0019(10) 0.0049(10) 0.0034(10) 
S4 0.0516(13) 0.0380(11) 0.0540(13) -0.0024(9) 0.0051(10) -0.0030(9) 
O1 0.080(5) 0.133(5) 0.072(5) 0.033(4) -0.025(3) 0.000(4) 
O2 0.100(5) 0.089(5) 0.076(5) 0.001(4) 0.038(4) 0.020(4) 
O3 0.108(5) 0.081(5) 0.133(6) 0.025(4) 0.036(4) -0.036(4) 
O4 0.111(5) 0.077(4) 0.043(4) -0.012(3) 0.005(3) 0.000(3) 
O5 0.110(5) 0.051(4) 0.072(4) 0.020(3) 0.030(3) 0.014(3) 
O6 0.054(4) 0.102(5) 0.092(5) 0.004(3) 0.023(3) 0.011(4) 
O7 0.101(4) 0.101(5) 0.023(3) -0.015(3) 0.024(3) -0.050(3) 
O8 0.181(6) 0.091(5) 0.091(5) -0.011(4) 0.079(5) -0.019(4) 
O9 0.083(5) 0.073(4) 0.122(5) -0.004(4) -0.002(4) -0.040(3) 
O10 0.063(5) 0.070(5) 0.233(9) 0.000(5) 0.002(5) 0.012(4) 
O11 0.116(5) 0.072(4) 0.087(5) -0.031(3) -0.012(4) -0.015(4) 
O12 0.114(5) 0.080(5) 0.097(5) 0.010(4) -0.043(4) 0.011(4) 
O13 0.072(4) 0.098(5) 0.099(5) -0.018(4) 0.034(4) -0.004(4) 
O14 0.085(4) 0.107(5) 0.046(4) 0.026(3) -0.023(3) -0.036(4) 
C1 0.047(5) 0.072(6) 0.059(6) 0.012(5) 0.001(4) -0.006(5) 
C2 0.065(6) 0.059(6) 0.056(6) 0.026(5) 0.024(5) 0.009(4) 
C3 0.058(6) 0.068(6) 0.062(6) -0.003(5) 0.011(4) 0.003(5) 
C4 0.055(5) 0.056(5) 0.042(5) 0.005(4) -0.002(4) 0.004(4) 
C5 0.048(5) 0.063(5) 0.034(5) -0.007(4) 0.000(4) 0.002(4) 
C6 0.061(6) 0.064(5) 0.041(5) 0.014(4) 0.004(4) 0.017(5) 
C7 0.062(5) 0.064(5) 0.040(5) 0.006(4) 0.008(4) -0.008(4) 
C8 0.129(8) 0.067(6) 0.048(6) -0.020(5) 0.051(5) -0.039(6) 
C9 0.102(7) 0.043(5) 0.057(6) -0.009(4) 0.027(5) -0.009(5) 
C10 0.099(7) 0.065(6) 0.097(8) 0.000(6) 0.054(6) -0.003(5) 
C11 0.036(5) 0.063(6) 0.086(7) 0.018(5) 0.004(5) -0.006(4) 
C12 0.053(6) 0.049(6) 0.127(9) -0.012(5) 0.022(6) -0.012(5) 
C13 0.060(6) 0.068(6) 0.046(6) -0.002(4) -0.007(4) -0.001(5) 
C14 0.055(6) 0.046(5) 0.076(7) -0.013(4) -0.004(5) 0.003(4) 
C15 0.058(6) 0.059(5) 0.060(6) -0.004(4) 0.000(5) 0.005(5) 
C16 0.052(5) 0.067(6) 0.052(5) 0.006(4) -0.015(4) 0.002(4) 
C17 0.064(6) 0.074(6) 0.043(5) 0.004(5) -0.010(4) -0.018(5) 
C18 0.076(6) 0.056(5) 0.043(5) 0.000(4) -0.014(4) -0.011(4) 
C19 0.103(7) 0.105(7) 0.057(6) -0.012(5) 0.023(5) -0.006(6) 
Cl1 0.096(2) 0.300(5) 0.116(3) -0.017(3) 0.0171(18) -0.020(3) 
Cl2 0.129(2) 0.105(2) 0.114(2) 0.0009(16) -0.0475(18) -0.0044(18) 
Cl3 0.176(3) 0.181(3) 0.123(3) 0.075(2) 0.023(2) 0.033(2) 
  
_geom_special_details 
; 
 All esds (except the esd in the dihedral angle between two l.s. planes) 
 are estimated using the full covariance matrix.  The cell esds are taken 
 into account individually in the estimation of esds in distances, angles 
 and torsion angles; correlations between esds in cell parameters are only 
 used when they are defined by crystal symmetry.  An approximate (isotropic) 
 treatment of cell esds is used for estimating esds involving l.s. planes. 
; 
  
loop_ 
 _geom_bond_atom_site_label_1 
 _geom_bond_atom_site_label_2 
 _geom_bond_distance 
 _geom_bond_site_symmetry_2 
 _geom_bond_publ_flag 
Fe1 C1 1.772(8) . ? 
Fe1 C3 1.779(8) . ? 
Fe1 C2 1.782(9) . ? 
Fe1 S1 2.258(2) . ? 
Fe1 S2 2.263(2) . ? 
Fe1 Fe2 2.5164(14) . ? 
Fe2 C4 1.767(8) . ? 
Fe2 C5 1.782(8) . ? 
Fe2 C6 1.786(8) . ? 
Fe2 S1 2.2582(19) . ? 
Fe2 S2 2.266(2) . ? 
Fe3 C10 1.763(9) . ? 
Fe3 C11 1.781(8) . ? 
Fe3 C12 1.785(9) . ? 
Fe3 S3 2.260(2) . ? 
Fe3 S4 2.264(2) . ? 
Fe3 Fe4 2.5145(15) . ? 
Fe4 C14 1.770(8) . ? 
Fe4 C15 1.794(8) . ? 
Fe4 C13 1.798(8) . ? 
Fe4 S4 2.249(2) . ? 
Fe4 S3 2.256(2) . ? 
S1 C7 1.822(6) . ? 
S2 C9 1.792(7) . ? 
S3 C16 1.829(6) . ? 
S4 C18 1.790(6) . ? 
O1 C1 1.142(7) . ? 
O2 C2 1.146(8) . ? 
O3 C3 1.160(7) . ? 
O4 C4 1.159(7) . ? 
O5 C5 1.144(7) . ? 
O6 C6 1.150(7) . ? 
O7 C8 1.427(7) . ? 
O7 H7 0.8200 . ? 
O8 C10 1.164(9) . ? 
O9 C11 1.153(7) . ? 
O10 C12 1.152(8) . ? 
O11 C13 1.148(7) . ? 
O12 C14 1.153(7) . ? 
O13 C15 1.148(7) . ? 
O14 C17 1.440(7) . ? 
O14 H14 0.8200 . ? 
C7 C8 1.481(8) . ? 
C7 H7A 0.9700 . ? 
C7 H7B 0.9700 . ? 
C8 C9 1.433(8) . ? 
C8 H8 0.9800 . ? 
C9 H9A 0.9700 . ? 
C9 H9B 0.9700 . ? 
C16 C17 1.511(8) . ? 
C16 H16A 0.9700 . ? 
C16 H16B 0.9700 . ? 
C17 C18 1.474(8) . ? 
C17 H17 0.9800 . ? 
C18 H18A 0.9700 . ? 
C18 H18B 0.9700 . ? 
C19 Cl3 1.687(8) . ? 
C19 Cl2 1.689(7) . ? 
C19 Cl1 1.761(8) . ? 
C19 H19 0.9800 . ? 
  
loop_ 
 _geom_angle_atom_site_label_1 
 _geom_angle_atom_site_label_2 
 _geom_angle_atom_site_label_3 
 _geom_angle 
 _geom_angle_site_symmetry_1 
 _geom_angle_site_symmetry_3 
 _geom_angle_publ_flag 
C1 Fe1 C3 99.7(3) . . ? 
C1 Fe1 C2 100.2(3) . . ? 
C3 Fe1 C2 90.9(3) . . ? 
C1 Fe1 S1 100.2(2) . . ? 
C3 Fe1 S1 160.0(2) . . ? 
C2 Fe1 S1 87.8(2) . . ? 
C1 Fe1 S2 104.7(3) . . ? 
C3 Fe1 S2 87.4(2) . . ? 
C2 Fe1 S2 154.9(2) . . ? 
S1 Fe1 S2 85.30(7) . . ? 
C1 Fe1 Fe2 147.8(2) . . ? 
C3 Fe1 Fe2 104.6(2) . . ? 
C2 Fe1 Fe2 100.2(2) . . ? 
S1 Fe1 Fe2 56.14(5) . . ? 
S2 Fe1 Fe2 56.30(6) . . ? 
C4 Fe2 C5 90.8(3) . . ? 
C4 Fe2 C6 96.3(3) . . ? 
C5 Fe2 C6 100.3(3) . . ? 
C4 Fe2 S1 88.0(2) . . ? 
C5 Fe2 S1 155.9(2) . . ? 
C6 Fe2 S1 103.8(2) . . ? 
C4 Fe2 S2 157.8(2) . . ? 
C5 Fe2 S2 86.9(2) . . ? 
C6 Fe2 S2 105.8(2) . . ? 
S1 Fe2 S2 85.24(7) . . ? 
C4 Fe2 Fe1 102.8(2) . . ? 
C5 Fe2 Fe1 100.8(2) . . ? 
C6 Fe2 Fe1 151.2(2) . . ? 
S1 Fe2 Fe1 56.14(5) . . ? 
S2 Fe2 Fe1 56.20(6) . . ? 
C10 Fe3 C11 98.1(4) . . ? 
C10 Fe3 C12 100.0(4) . . ? 
C11 Fe3 C12 89.6(3) . . ? 
C10 Fe3 S3 103.6(3) . . ? 
C11 Fe3 S3 87.9(2) . . ? 
C12 Fe3 S3 156.4(3) . . ? 
C10 Fe3 S4 105.5(3) . . ? 
C11 Fe3 S4 156.3(3) . . ? 
C12 Fe3 S4 87.8(2) . . ? 
S3 Fe3 S4 85.16(7) . . ? 
C10 Fe3 Fe4 150.5(3) . . ? 
C11 Fe3 Fe4 101.8(3) . . ? 
C12 Fe3 Fe4 101.6(3) . . ? 
S3 Fe3 Fe4 56.09(6) . . ? 
S4 Fe3 Fe4 55.87(6) . . ? 
C14 Fe4 C15 100.2(3) . . ? 
C14 Fe4 C13 90.8(3) . . ? 
C15 Fe4 C13 99.7(3) . . ? 
C14 Fe4 S4 87.3(2) . . ? 
C15 Fe4 S4 100.5(2) . . ? 
C13 Fe4 S4 159.7(3) . . ? 
C14 Fe4 S3 157.8(3) . . ? 
C15 Fe4 S3 101.9(2) . . ? 
C13 Fe4 S3 88.6(2) . . ? 
S4 Fe4 S3 85.58(8) . . ? 
C14 Fe4 Fe3 102.6(3) . . ? 
C15 Fe4 Fe3 146.3(2) . . ? 
C13 Fe4 Fe3 104.5(3) . . ? 
S4 Fe4 Fe3 56.41(6) . . ? 
S3 Fe4 Fe3 56.23(6) . . ? 
C7 S1 Fe1 111.7(2) . . ? 
C7 S1 Fe2 112.2(2) . . ? 
Fe1 S1 Fe2 67.72(6) . . ? 
C9 S2 Fe1 110.5(2) . . ? 
C9 S2 Fe2 113.4(2) . . ? 
Fe1 S2 Fe2 67.50(6) . . ? 
C16 S3 Fe4 110.3(2) . . ? 
C16 S3 Fe3 113.8(2) . . ? 
Fe4 S3 Fe3 67.68(6) . . ? 
C18 S4 Fe4 110.7(2) . . ? 
C18 S4 Fe3 113.7(2) . . ? 
Fe4 S4 Fe3 67.72(6) . . ? 
C8 O7 H7 109.5 . . ? 
C17 O14 H14 109.5 . . ? 
O1 C1 Fe1 178.4(7) . . ? 
O2 C2 Fe1 177.7(8) . . ? 
O3 C3 Fe1 178.4(8) . . ? 
O4 C4 Fe2 177.9(7) . . ? 
O5 C5 Fe2 177.3(7) . . ? 
O6 C6 Fe2 176.6(8) . . ? 
C8 C7 S1 120.0(5) . . ? 
C8 C7 H7A 107.3 . . ? 
S1 C7 H7A 107.3 . . ? 
C8 C7 H7B 107.3 . . ? 
S1 C7 H7B 107.3 . . ? 
H7A C7 H7B 106.9 . . ? 
O7 C8 C9 111.2(6) . . ? 
O7 C8 C7 111.5(6) . . ? 
C9 C8 C7 119.7(7) . . ? 
O7 C8 H8 104.3 . . ? 
C9 C8 H8 104.3 . . ? 
C7 C8 H8 104.3 . . ? 
C8 C9 S2 120.8(5) . . ? 
C8 C9 H9A 107.1 . . ? 
S2 C9 H9A 107.1 . . ? 
C8 C9 H9B 107.1 . . ? 
S2 C9 H9B 107.1 . . ? 
H9A C9 H9B 106.8 . . ? 
O8 C10 Fe3 178.2(9) . . ? 
O9 C11 Fe3 177.7(7) . . ? 
O10 C12 Fe3 178.8(9) . . ? 
O11 C13 Fe4 178.9(7) . . ? 
O12 C14 Fe4 179.3(8) . . ? 
O13 C15 Fe4 177.0(8) . . ? 
C17 C16 S3 117.1(5) . . ? 
C17 C16 H16A 108.0 . . ? 
S3 C16 H16A 108.0 . . ? 
C17 C16 H16B 108.0 . . ? 
S3 C16 H16B 108.0 . . ? 
H16A C16 H16B 107.3 . . ? 
O14 C17 C18 109.6(6) . . ? 
O14 C17 C16 109.2(6) . . ? 
C18 C17 C16 116.6(6) . . ? 
O14 C17 H17 107.0 . . ? 
C18 C17 H17 107.0 . . ? 
C16 C17 H17 107.0 . . ? 
C17 C18 S4 119.2(5) . . ? 
C17 C18 H18A 107.5 . . ? 
S4 C18 H18A 107.5 . . ? 
C17 C18 H18B 107.5 . . ? 
S4 C18 H18B 107.5 . . ? 
H18A C18 H18B 107.0 . . ? 
Cl3 C19 Cl2 116.0(5) . . ? 
Cl3 C19 Cl1 108.9(5) . . ? 
Cl2 C19 Cl1 110.3(5) . . ? 
Cl3 C19 H19 107.1 . . ? 
Cl2 C19 H19 107.1 . . ? 
Cl1 C19 H19 107.1 . . ? 
  
loop_ 
 _geom_torsion_atom_site_label_1 
 _geom_torsion_atom_site_label_2 
 _geom_torsion_atom_site_label_3 
 _geom_torsion_atom_site_label_4 
 _geom_torsion 
 _geom_torsion_site_symmetry_1 
 _geom_torsion_site_symmetry_2 
 _geom_torsion_site_symmetry_3 
 _geom_torsion_site_symmetry_4 
 _geom_torsion_publ_flag 
C1 Fe1 Fe2 C4 -127.0(5) . . . . ? 
C3 Fe1 Fe2 C4 95.3(3) . . . . ? 
C2 Fe1 Fe2 C4 1.7(3) . . . . ? 
S1 Fe1 Fe2 C4 -78.7(2) . . . . ? 
S2 Fe1 Fe2 C4 172.1(2) . . . . ? 
C1 Fe1 Fe2 C5 139.7(5) . . . . ? 
C3 Fe1 Fe2 C5 2.0(3) . . . . ? 
C2 Fe1 Fe2 C5 -91.7(3) . . . . ? 
S1 Fe1 Fe2 C5 -172.1(2) . . . . ? 
S2 Fe1 Fe2 C5 78.7(2) . . . . ? 
C1 Fe1 Fe2 C6 3.3(7) . . . . ? 
C3 Fe1 Fe2 C6 -134.4(6) . . . . ? 
C2 Fe1 Fe2 C6 131.9(6) . . . . ? 
S1 Fe1 Fe2 C6 51.5(5) . . . . ? 
S2 Fe1 Fe2 C6 -57.7(5) . . . . ? 
C1 Fe1 Fe2 S1 -48.3(5) . . . . ? 
C3 Fe1 Fe2 S1 174.0(3) . . . . ? 
C2 Fe1 Fe2 S1 80.4(2) . . . . ? 
S2 Fe1 Fe2 S1 -109.20(9) . . . . ? 
C1 Fe1 Fe2 S2 60.9(5) . . . . ? 
C3 Fe1 Fe2 S2 -76.8(3) . . . . ? 
C2 Fe1 Fe2 S2 -170.4(2) . . . . ? 
S1 Fe1 Fe2 S2 109.20(9) . . . . ? 
C10 Fe3 Fe4 C14 -135.3(6) . . . . ? 
C11 Fe3 Fe4 C14 93.1(3) . . . . ? 
C12 Fe3 Fe4 C14 1.1(3) . . . . ? 
S3 Fe3 Fe4 C14 172.4(2) . . . . ? 
S4 Fe3 Fe4 C14 -78.1(2) . . . . ? 
C10 Fe3 Fe4 C15 -4.0(7) . . . . ? 
C11 Fe3 Fe4 C15 -135.5(5) . . . . ? 
C12 Fe3 Fe4 C15 132.4(5) . . . . ? 
S3 Fe3 Fe4 C15 -56.2(4) . . . . ? 
S4 Fe3 Fe4 C15 53.2(4) . . . . ? 
C10 Fe3 Fe4 C13 130.5(6) . . . . ? 
C11 Fe3 Fe4 C13 -1.0(3) . . . . ? 
C12 Fe3 Fe4 C13 -93.0(3) . . . . ? 
S3 Fe3 Fe4 C13 78.3(2) . . . . ? 
S4 Fe3 Fe4 C13 -172.3(2) . . . . ? 
C10 Fe3 Fe4 S4 -57.2(6) . . . . ? 
C11 Fe3 Fe4 S4 171.2(2) . . . . ? 
C12 Fe3 Fe4 S4 79.2(3) . . . . ? 
S3 Fe3 Fe4 S4 -109.44(9) . . . . ? 
C10 Fe3 Fe4 S3 52.2(6) . . . . ? 
C11 Fe3 Fe4 S3 -79.3(2) . . . . ? 
C12 Fe3 Fe4 S3 -171.3(3) . . . . ? 
S4 Fe3 Fe4 S3 109.44(9) . . . . ? 
C1 Fe1 S1 C7 50.2(4) . . . . ? 
C3 Fe1 S1 C7 -123.1(8) . . . . ? 
C2 Fe1 S1 C7 150.2(3) . . . . ? 
S2 Fe1 S1 C7 -54.0(2) . . . . ? 
Fe2 Fe1 S1 C7 -106.0(2) . . . . ? 
C1 Fe1 S1 Fe2 156.2(3) . . . . ? 
C3 Fe1 S1 Fe2 -17.1(7) . . . . ? 
C2 Fe1 S1 Fe2 -103.8(2) . . . . ? 
S2 Fe1 S1 Fe2 52.03(6) . . . . ? 
C4 Fe2 S1 C7 -147.8(3) . . . . ? 
C5 Fe2 S1 C7 124.7(6) . . . . ? 
C6 Fe2 S1 C7 -51.8(3) . . . . ? 
S2 Fe2 S1 C7 53.4(2) . . . . ? 
Fe1 Fe2 S1 C7 105.3(2) . . . . ? 
C4 Fe2 S1 Fe1 106.9(2) . . . . ? 
C5 Fe2 S1 Fe1 19.4(5) . . . . ? 
C6 Fe2 S1 Fe1 -157.1(2) . . . . ? 
S2 Fe2 S1 Fe1 -51.95(7) . . . . ? 
C1 Fe1 S2 C9 -43.5(3) . . . . ? 
C3 Fe1 S2 C9 -142.8(4) . . . . ? 
C2 Fe1 S2 C9 130.4(6) . . . . ? 
S1 Fe1 S2 C9 55.8(3) . . . . ? 
Fe2 Fe1 S2 C9 107.7(3) . . . . ? 
C1 Fe1 S2 Fe2 -151.2(2) . . . . ? 
C3 Fe1 S2 Fe2 109.4(2) . . . . ? 
C2 Fe1 S2 Fe2 22.7(6) . . . . ? 
S1 Fe1 S2 Fe2 -51.90(6) . . . . ? 
C4 Fe2 S2 C9 -124.3(6) . . . . ? 
C5 Fe2 S2 C9 151.2(3) . . . . ? 
C6 Fe2 S2 C9 51.4(4) . . . . ? 
S1 Fe2 S2 C9 -51.6(3) . . . . ? 
Fe1 Fe2 S2 C9 -103.5(3) . . . . ? 
C4 Fe2 S2 Fe1 -20.8(6) . . . . ? 
C5 Fe2 S2 Fe1 -105.3(2) . . . . ? 
C6 Fe2 S2 Fe1 155.0(2) . . . . ? 
S1 Fe2 S2 Fe1 51.90(6) . . . . ? 
C14 Fe4 S3 C16 -128.1(7) . . . . ? 
C15 Fe4 S3 C16 43.6(4) . . . . ? 
C13 Fe4 S3 C16 143.2(4) . . . . ? 
S4 Fe4 S3 C16 -56.3(3) . . . . ? 
Fe3 Fe4 S3 C16 -108.3(3) . . . . ? 
C14 Fe4 S3 Fe3 -19.9(6) . . . . ? 
C15 Fe4 S3 Fe3 151.9(2) . . . . ? 
C13 Fe4 S3 Fe3 -108.5(2) . . . . ? 
S4 Fe4 S3 Fe3 51.99(6) . . . . ? 
C10 Fe3 S3 C16 -53.2(4) . . . . ? 
C11 Fe3 S3 C16 -151.0(3) . . . . ? 
C12 Fe3 S3 C16 124.8(6) . . . . ? 
S4 Fe3 S3 C16 51.7(3) . . . . ? 
Fe4 Fe3 S3 C16 103.2(3) . . . . ? 
C10 Fe3 S3 Fe4 -156.4(3) . . . . ? 
C11 Fe3 S3 Fe4 105.7(3) . . . . ? 
C12 Fe3 S3 Fe4 21.6(6) . . . . ? 
S4 Fe3 S3 Fe4 -51.56(6) . . . . ? 
C14 Fe4 S4 C18 -144.9(3) . . . . ? 
C15 Fe4 S4 C18 -45.0(3) . . . . ? 
C13 Fe4 S4 C18 130.0(7) . . . . ? 
S3 Fe4 S4 C18 56.2(3) . . . . ? 
Fe3 Fe4 S4 C18 108.0(3) . . . . ? 
C14 Fe4 S4 Fe3 107.1(3) . . . . ? 
C15 Fe4 S4 Fe3 -153.1(2) . . . . ? 
C13 Fe4 S4 Fe3 22.0(7) . . . . ? 
S3 Fe4 S4 Fe3 -51.83(7) . . . . ? 
C10 Fe3 S4 C18 50.8(4) . . . . ? 
C11 Fe3 S4 C18 -125.5(6) . . . . ? 
C12 Fe3 S4 C18 150.6(4) . . . . ? 
S3 Fe3 S4 C18 -52.0(3) . . . . ? 
Fe4 Fe3 S4 C18 -103.7(3) . . . . ? 
C10 Fe3 S4 Fe4 154.6(3) . . . . ? 
C11 Fe3 S4 Fe4 -21.7(6) . . . . ? 
C12 Fe3 S4 Fe4 -105.6(3) . . . . ? 
S3 Fe3 S4 Fe4 51.76(6) . . . . ? 
C3 Fe1 C1 O1 163(30) . . . . ? 
C2 Fe1 C1 O1 -105(30) . . . . ? 
S1 Fe1 C1 O1 -15(30) . . . . ? 
S2 Fe1 C1 O1 73(30) . . . . ? 
Fe2 Fe1 C1 O1 24(30) . . . . ? 
C1 Fe1 C2 O2 143(18) . . . . ? 
C3 Fe1 C2 O2 -117(18) . . . . ? 
S1 Fe1 C2 O2 43(18) . . . . ? 
S2 Fe1 C2 O2 -31(19) . . . . ? 
Fe2 Fe1 C2 O2 -12(18) . . . . ? 
C1 Fe1 C3 O3 -23(28) . . . . ? 
C2 Fe1 C3 O3 -124(28) . . . . ? 
S1 Fe1 C3 O3 150(27) . . . . ? 
S2 Fe1 C3 O3 81(28) . . . . ? 
Fe2 Fe1 C3 O3 135(28) . . . . ? 
C5 Fe2 C4 O4 -13(19) . . . . ? 
C6 Fe2 C4 O4 88(19) . . . . ? 
S1 Fe2 C4 O4 -168(19) . . . . ? 
S2 Fe2 C4 O4 -96(19) . . . . ? 
Fe1 Fe2 C4 O4 -114(19) . . . . ? 
C4 Fe2 C5 O5 -27(15) . . . . ? 
C6 Fe2 C5 O5 -123(15) . . . . ? 
S1 Fe2 C5 O5 60(15) . . . . ? 
S2 Fe2 C5 O5 131(15) . . . . ? 
Fe1 Fe2 C5 O5 77(15) . . . . ? 
C4 Fe2 C6 O6 47(12) . . . . ? 
C5 Fe2 C6 O6 139(12) . . . . ? 
S1 Fe2 C6 O6 -42(12) . . . . ? 
S2 Fe2 C6 O6 -131(12) . . . . ? 
Fe1 Fe2 C6 O6 -84(12) . . . . ? 
Fe1 S1 C7 C8 56.8(6) . . . . ? 
Fe2 S1 C7 C8 -17.0(7) . . . . ? 
S1 C7 C8 O7 -178.7(5) . . . . ? 
S1 C7 C8 C9 -46.6(10) . . . . ? 
O7 C8 C9 S2 -177.5(5) . . . . ? 
C7 C8 C9 S2 50.2(10) . . . . ? 
Fe1 S2 C9 C8 -62.9(7) . . . . ? 
Fe2 S2 C9 C8 10.7(7) . . . . ? 
C11 Fe3 C10 O8 74(29) . . . . ? 
C12 Fe3 C10 O8 165(29) . . . . ? 
S3 Fe3 C10 O8 -16(29) . . . . ? 
S4 Fe3 C10 O8 -104(29) . . . . ? 
Fe4 Fe3 C10 O8 -58(29) . . . . ? 
C10 Fe3 C11 O9 117(21) . . . . ? 
C12 Fe3 C11 O9 17(21) . . . . ? 
S3 Fe3 C11 O9 -139(21) . . . . ? 
S4 Fe3 C11 O9 -66(21) . . . . ? 
Fe4 Fe3 C11 O9 -85(21) . . . . ? 
C10 Fe3 C12 O10 161(43) . . . . ? 
C11 Fe3 C12 O10 -101(43) . . . . ? 
S3 Fe3 C12 O10 -17(43) . . . . ? 
S4 Fe3 C12 O10 56(43) . . . . ? 
Fe4 Fe3 C12 O10 1(43) . . . . ? 
C14 Fe4 C13 O11 3(47) . . . . ? 
C15 Fe4 C13 O11 -98(47) . . . . ? 
S4 Fe4 C13 O11 87(47) . . . . ? 
S3 Fe4 C13 O11 160(47) . . . . ? 
Fe3 Fe4 C13 O11 106(47) . . . . ? 
C15 Fe4 C14 O12 -153(100) . . . . ? 
C13 Fe4 C14 O12 107(69) . . . . ? 
S4 Fe4 C14 O12 -53(69) . . . . ? 
S3 Fe4 C14 O12 19(70) . . . . ? 
Fe3 Fe4 C14 O12 2(69) . . . . ? 
C14 Fe4 C15 O13 140(14) . . . . ? 
C13 Fe4 C15 O13 -127(14) . . . . ? 
S4 Fe4 C15 O13 51(14) . . . . ? 
S3 Fe4 C15 O13 -36(14) . . . . ? 
Fe3 Fe4 C15 O13 8(15) . . . . ? 
Fe4 S3 C16 C17 63.8(6) . . . . ? 
Fe3 S3 C16 C17 -10.0(6) . . . . ? 
S3 C16 C17 O14 179.4(5) . . . . ? 
S3 C16 C17 C18 -55.8(8) . . . . ? 
O14 C17 C18 S4 -178.7(5) . . . . ? 
C16 C17 C18 S4 56.6(9) . . . . ? 
Fe4 S4 C18 C17 -64.6(6) . . . . ? 
Fe3 S4 C18 C17 9.3(7) . . . . ? 
  
_diffrn_measured_fraction_theta_max    0.989 
_diffrn_reflns_theta_full              26.53 
_diffrn_measured_fraction_theta_full   0.989 
_refine_diff_density_max    0.451 
_refine_diff_density_min   -0.427 
_refine_diff_density_rms    0.105 
